# Supplementary material for: Depression in a Random Sample of Incarcerated African-American Men
Source: Atypon-hosted journal article supplement (doi:10.1176/ps.62.1.pss6201_0103a), 2011-01-01
Supplement: Rowell DS.pdf [file Rowell%20DS.pdf]

Table 1: Comparison of depressed ( $\geq 12$ ) and non-depressed participants

|                                  | Not depressed; n=77(57%) |                  | Depressed; n=57 (43%) |                  | $\chi^2$ |
|----------------------------------|--------------------------|------------------|-----------------------|------------------|----------|
|                                  | n(%)                     | Mean (SD)        | n(%)                  | Mean(SD)         |          |
| <i>Demographics</i>              |                          |                  |                       |                  |          |
| Age                              |                          | 40.34(SD=9.84)   |                       | 44.4(SD=11.66)   |          |
| Marital Status                   |                          |                  |                       |                  | 1.20     |
| Not Married                      | 64(83%)                  |                  | 43(75%)               |                  |          |
| Married                          | 13(17%)                  |                  | 14(25%)               |                  |          |
| Education                        |                          |                  |                       |                  | 3.82*    |
| NO GED/HS                        | 8(10%)                   |                  | 13(23%)               |                  |          |
| GED/HS                           | 69(90%)                  |                  | 44(77%)               |                  |          |
| Religion                         |                          |                  |                       |                  | .161     |
| Muslim                           | 31(40%)                  |                  | 21(37%)               |                  |          |
| Christian                        | 46(60%)                  |                  | 36(63%)               |                  |          |
| <i>Criminal Background</i>       |                          |                  |                       |                  |          |
| Previous Incarceration           |                          |                  |                       |                  | .031     |
| No                               | 39(51%)                  |                  | 28(49%)               |                  |          |
| Yes                              | 38(49%)                  |                  | 29(50%)               |                  |          |
| Length of previous sentence      |                          | 39.8(SD=69.46)   |                       | 43.5(SD=67.88)   |          |
| On Probation and/or Parole       |                          |                  |                       |                  | 7.98*    |
| No                               | 55(71%)                  |                  | 27(47%)               |                  |          |
| Yes                              | 22(29%)                  |                  | 30(53%)               |                  |          |
| Current Offense                  |                          |                  |                       |                  | .028     |
| Non-violent                      | 24(31%)                  |                  | 17(30%)               |                  |          |
| Violent                          | 53(69%)                  |                  | 40(70%)               |                  |          |
| Current Sentence (months)        |                          | 440.8(SD=304.14) |                       | 462.5(SD=308.32) |          |
| Total Time Incarcerated (months) |                          | 136.9(SD=113.52) |                       | 185.3(SD=126.99) |          |
| Time to Release (months)         |                          | 318.3(SD=253.02) |                       | 291.1(SD=255.91) |          |

\*  $p < .05$

Table 2: Logistic regression on depression status among incarcerated African-American men (N=134)

| <b>Variable</b>                              | <b>OR</b> | <b>95% CI</b> |
|----------------------------------------------|-----------|---------------|
| Age                                          | 1.03      | .99–1.08      |
| Marital Status (reference: unmarried)        | .79       | .31–2.07      |
| Education (reference: no H.S. education/GED) | 2.88†     | .96–8.59      |
| On Probation/Parole (reference: no)          | .27*      | .11–.67       |
| Previous Incarceration (reference: no)       | 2.15      | .85–5.44      |
| Time Incarcerated                            | 1.12      | .66–1.89      |
| Sentence Received                            | .89       | .55–1.42      |

†p<.10

\*p<.01
